# Supplementary material for: Electrically tunable perfect light absorbers as color filters and modulators
Source: PubMed Central journal article supplement (PMC5805698; doi:10.1038/s41598-018-20879-z), 2018-02-08
Supplement: 41598_2018_20879_MOESM1_ESM.pdf [file 41598_2018_20879_MOESM1_ESM.pdf]

**Supplementary Information for**

# **Electrically tunable perfect light absorbers as color filters and modulators**

Seyed Sadreddin Mirshafieyan<sup>1</sup> and Don A. Gregory<sup>2,\*</sup>

<sup>1</sup>Department of Electrical and Computer Engineering, The University of Alabama in Huntsville, Huntsville, Alabama 35899, USA

<sup>2</sup>Department of Physics, The University of Alabama in Huntsville, Huntsville, Alabama 35899, USA

\*E-mail: [gregoryd@uah.edu](mailto:gregoryd@uah.edu)

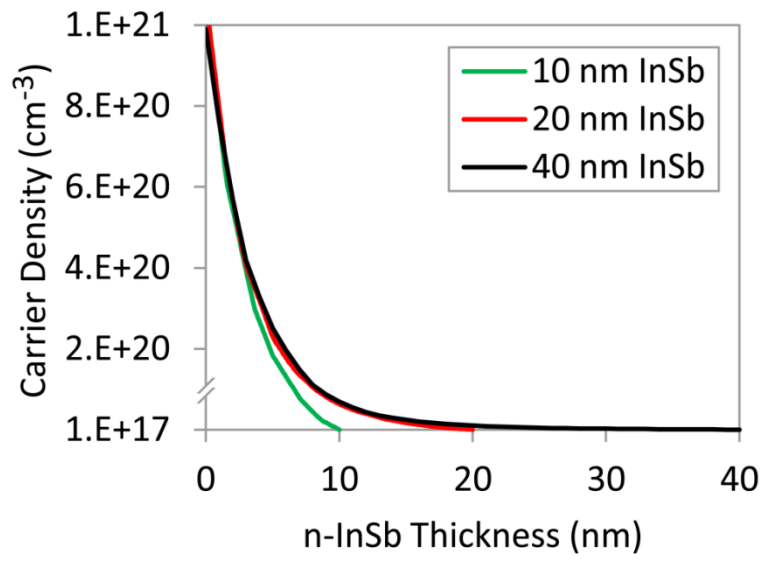

**Figure S1.** Variation of carrier density (with a -50 V bias) inside the InSb layer for three devices with InSb thicknesses of 10 nm, 20 nm, and 40 nm.
